# Supplementary material for: Mental arithmetic modulates temporal variabilities of finger-tapping tasks in a tempo-dependent manner
Source: PeerJ. 2022 Aug 25;10:e13944. doi: 10.7717/peerj.13944 (PMC9420403; doi:10.7717/peerj.13944)
Supplement: Data S1 — The datasets of all parameters. The sheet names are associated with the number of Figures. [file peerj-10-13944-s001.xlsx]

## Sheet: Participants
ID	Gender	Age	Edinburgh Handedness Inventory
#1	M	31	11.1111
#2	F	31	80
#3	F	60	100
#4	M	27	100
#5	M	24	100
#6	M	34	100
#7	F	31	80
#8	F	32	100
#9	M	40	100
#10	M	34	100
#11	M	34	100
#12	F	37	100
#13	M	61	100
#14	F	35	100
#15	M	31	100
#16	M	21	77.7778
#17	M	32	100
#18	M	29	100
#19	M	32	75
#20	M	32	100
#21	F	34	100
#22	M	33	80
#23	M	37	100
#24	M	27	100
#25	M	22	100
#26	M	21	100
#27	M	21	80
#28	M	39	100
#29	F	32	100
#30	M	38	100

## Sheet: Figure 2A
ITI Mean	ITI								ITI								ITI
CTL	4 sec	3 sec	2 sec	1 sec	0.5 sec	0.33 sec		MR	4 sec	3 sec	2 sec	1 sec	0.5 sec	0.33 sec		MA	4 sec	3 sec	2 sec	1 sec	0.5 sec	0.33 sec
#1	4.46226	3.58545	2.02727	0.959476	0.453624	0.252711		#1	5.0003	3.94041	2.44764	0.966781	0.443242	0.248584		#1	4.4432	3.67711	2.55411	1.00086	0.478793	0.243265
#2	3.44901	2.40502	1.66292	0.719097	0.463586	0.262088		#2	4.01933	2.42394	1.34825	0.629473	0.517367	0.32218		#2	2.29263	2.06869	1.34705	0.76929	0.468658	0.298042
#3	4.72064	3.11527	2.17281	1.00933	0.441865	0.272495		#3	4.96348	2.9943	1.91293	0.980374	0.423676	0.283966		#3	4.33391	3.07611	1.86107	1.03387	0.450499	0.292381
#4	4.98781	3.01521	2.02651	1.02405	0.366216	0.211378		#4	4.16107	3.09273	2.01578	0.931123	0.34963	0.21797		#4	3.72268	3.15437	2.07148	0.938318	0.363852	0.228126
#5	3.92032	3.13063	1.95976	0.979504	0.331017	0.202557		#5	3.97445	2.80591	2.0118	0.960373	0.329128	0.211912		#5	4.14181	3.16771	1.98502	0.918141	0.347283	0.23293
#6	4.47753	2.97169	2.1714	1.06335	0.516203	0.244326		#6	4.24314	3.11747	2.04565	1.08976	0.472949	0.224464		#6	4.11918	2.87479	2.16451	1.05934	0.479967	0.22391
#7	3.77206	2.97921	2.06576	0.948029	0.529069	0.30124		#7	3.95116	2.91009	2.05482	0.928146	0.481434	0.33414		#7	3.90589	2.91262	1.97048	1.00165	0.482535	0.316116
#8	3.78106	2.80583	1.9241	0.933206	0.492938	0.29632		#8	3.57944	2.98319	1.8788	0.979609	0.442413	0.286374		#8	3.56921	2.93088	1.89291	0.979771	0.440949	0.294472
#9	4.23938	3.14616	1.85644	0.891853	0.36191	0.214014		#9	4.04018	3.00171	2.0824	0.989116	0.301805	0.208151		#9	3.95256	2.87657	2.09779	0.884868	0.328115	0.197609
#10	4.11479	2.94359	1.98861	0.993997	0.44734	0.272329		#10	4.08966	3.16844	1.96667	0.944003	0.448422	0.281313		#10	4.10397	2.92527	2.03558	0.963998	0.470737	0.276359
#11	4.25835	3.1155	2.31476	0.99895	0.378408	0.209345		#11	3.94338	3.22166	2.07811	1.0338	0.449374	0.199708		#11	4.07403	3.14607	2.31472	0.992896	0.378985	0.201439
#12	3.99174	3.24284	2.04037	1.00549	0.520231	0.319493		#12	3.71544	3.1505	2.00705	1.00082	0.482861	0.300559		#12	3.82049	3.01906	2.00481	0.987622	0.488823	0.314094
#13	3.99403	2.85157	2.19388	1.09209	0.466905	0.298767		#13	3.96977	2.96144	2.21846	0.970086	0.506216	0.290215		#13	3.77345	2.97461	2.21182	1.02116	0.517747	0.301264
#14	3.92234	2.92762	1.94966	0.931236	0.502307	0.311597		#14	4.06076	2.96667	1.97265	1.03092	0.442507	0.311794		#14	4.08286	2.9393	2.11536	1.01453	0.488163	0.317454
#15	3.46641	3.26944	2.20989	1.0407	0.515586	0.277016		#15	4.40159	3.35789	2.29729	1.00807	0.435505	0.272098		#15	4.15946	3.26606	2.00636	1.0281	0.472306	0.27506
#16	4.35957	3.52022	2.17222	1.07349	0.385907	0.240924		#16	4.59436	3.17301	2.16004	0.974974	0.439037	0.266878		#16	4.52975	3.34617	2.09103	0.983957	0.401954	0.240882
#17	4.15849	3.21419	2.01484	0.999162	0.484571	0.362899		#17	4.39112	3.16525	2.1465	1.01003	0.479976	0.325568		#17	4.2059	3.30927	2.15352	0.97587	0.470717	0.360167
#18	4.08552	3.07132	2.1365	1.01054	0.45808	0.288923		#18	4.7364	2.74374	1.8864	0.982025	0.439632	0.31182		#18	4.14889	2.75184	1.86073	0.931156	0.428781	0.300915
#19	3.99531	3.26944	2.06371	0.871518	0.449626	0.200395		#19	3.65847	2.86305	2.04283	0.955592	0.333799	0.184015		#19	4.47865	3.30881	2.19091	0.870723	0.38115	0.199993
#20	4.02538	3.06193	2.02278	1.01037	0.497067	0.330321		#20	3.97066	3.01252	2.02659	0.996998	0.495172	0.319916		#20	3.9586	2.87296	1.87973	0.989883	0.48478	0.328526
#21	4.10695	2.84609	1.66665	0.796179	0.421733	0.31652		#21	3.73275	2.96368	1.55176	0.925309	0.403466	0.308445		#21	3.78707	2.71006	1.58699	0.870916	0.448189	0.29715
#22	4.07297	3.11832	2.07084	0.941811	0.45234	0.253121		#22	3.9591	2.98126	2.12686	0.958544	0.426914	0.234258		#22	3.73169	2.70873	1.94147	0.951742	0.435382	0.241147
#23	4.53717	3.42348	2.02138	1.00543	0.434234	0.225778		#23	4.50395	3.29241	1.99758	0.95129	0.395058	0.213545		#23	4.19596	3.39905	2.03745	0.959739	0.401204	0.211814
#24	4.13237	3.25493	2.04517	0.962402	0.512312	0.28033		#24	4.661	3.04664	1.96816	0.951036	0.498789	0.263778		#24	4.05585	3.19319	1.94805	0.950919	0.48427	0.266896
#25	4.00129	3.00094	1.99983	0.999416	0.381212	0.265994		#25	3.99872	3.14879	1.9973	1.00141	0.434277	0.280319		#25	4.00004	3.05433	1.99723	1.03873	0.424988	0.255937
#26	3.71926	3.02789	1.91836	0.94948	0.479522	0.274227		#26	3.9468	2.9464	1.95195	0.919589	0.447648	0.272756		#26	4.44996	2.89861	1.92034	0.9162	0.467753	0.290327
#27	4.15141	2.98228	2.01898	1.0048	0.460857	0.343513		#27	3.93228	2.95174	1.99128	1.03011	0.461798	0.350687		#27	4.04621	2.87007	2.11941	1.00355	0.460054	0.347901
#28	3.90562	3.09341	2.08676	1.03076	0.466912	0.280354		#28	3.96234	3.06596	2.02213	1.01532	0.424293	0.212029		#28	4.01786	3.09402	2.07428	0.979467	0.463166	0.231234
#29	4.03681	3.05464	1.94385	1.03601	0.47242	0.308382		#29	3.75809	2.87343	1.88391	0.961068	0.46805	0.311567		#29	3.96624	2.79636	1.99799	0.957275	0.48935	0.296311
#30	4.39241	3.21132	1.83211	0.915377	0.490008	0.304084		#30	4.2753	3.45403	1.9595	0.815869	0.457701	0.3032		#30	3.99869	3.57459	1.81622	0.762532	0.470091	0.279353

## Sheet: Figure 2B
ITI SD	ITI								ITI								ITI
CTL	4 sec	3 sec	2 sec	1 sec	0.5 sec	0.33 sec		MR	4 sec	3 sec	2 sec	1 sec	0.5 sec	0.33 sec		MA	4 sec	3 sec	2 sec	1 sec	0.5 sec	0.33 sec
#1	0.226006	0.376979	0.164533	0.047616	0.0223295	0.01564		#1	0.759073	0.49991	0.217876	0.0367839	0.0293212	0.0169346		#1	0.166585	0.420289	0.576343	0.0571188	0.0330072	0.0156352
#2	0.717855	0.437126	0.118388	0.0759739	0.0416119	0.0249998		#2	1.51889	0.627317	0.157262	0.0369575	0.037023	0.0346994		#2	0.67471	0.414453	0.192194	0.0768937	0.0313072	0.0285285
#3	0.271257	0.158582	0.139227	0.0585955	0.0343392	0.0141864		#3	1.00918	0.172346	0.11548	0.0625284	0.0272876	0.0168888		#3	0.318151	0.180035	0.100963	0.100838	0.0340139	0.0161372
#4	0.560206	0.295616	0.167425	0.0583868	0.028283	0.0179311		#4	0.627749	0.471485	0.274799	0.0719521	0.02805	0.0230246		#4	0.590458	0.555744	0.371893	0.0855547	0.0349527	0.0215439
#5	0.333357	0.17522	0.10044	0.0354343	0.024408	0.0078903		#5	0.405124	0.434277	0.0757031	0.0385309	0.0243912	0.0129515		#5	0.540131	0.131802	0.0731408	0.0333702	0.0192134	0.00935211
#6	0.237532	0.106749	0.119512	0.0457976	0.0270392	0.0194911		#6	0.233315	0.129806	0.0907	0.0400067	0.0342407	0.0135505		#6	0.169332	0.150354	0.133854	0.0590314	0.0383806	0.0149541
#7	0.699521	0.472748	0.0544577	0.0294864	0.020092	0.014349		#7	0.112831	0.16778	0.0676279	0.0367742	0.0214985	0.0186954		#7	0.144934	0.366372	0.0861005	0.0341665	0.0208977	0.0190723
#8	0.132848	0.14887	0.0735854	0.0449588	0.0173187	0.0116005		#8	0.144356	0.262913	0.0898888	0.0337545	0.0160066	0.0106159		#8	0.200825	0.309279	0.132846	0.0372635	0.0159056	0.0123738
#9	0.159882	0.129406	0.114335	0.048835	0.0288305	0.0179698		#9	0.303781	0.10006	0.130842	0.0560546	0.0187674	0.016131		#9	0.181027	0.159963	0.154171	0.0604135	0.0253054	0.0127328
#10	0.812199	0.357963	0.0696521	0.0476723	0.0375846	0.019207		#10	0.708363	0.508739	0.103673	0.0760122	0.0270916	0.0212131		#10	0.216755	0.408409	0.27934	0.103233	0.0481496	0.0177149
#11	0.303694	0.200906	0.158221	0.0607182	0.0271838	0.0116066		#11	0.185219	0.214406	0.134635	0.0744587	0.0305226	0.0100196		#11	0.270218	0.466633	0.233363	0.0854236	0.0269873	0.0146028
#12	0.122085	0.124616	0.0631511	0.0316152	0.0218392	0.0231101		#12	0.102728	0.112495	0.0513394	0.03483	0.023064	0.0219504		#12	0.318378	0.0886198	0.0747337	0.0444545	0.0220307	0.0239588
#13	0.273436	0.183561	0.121381	0.144541	0.0256525	0.016966		#13	0.562054	0.233047	0.128973	0.12459	0.0306224	0.0175609		#13	0.65374	0.562877	0.277184	0.063751	0.0356043	0.0189276
#14	0.0748494	0.0597414	0.030359	0.0418797	0.0568141	0.0309415		#14	0.399394	0.117169	0.0485406	0.0342823	0.0507463	0.0251519		#14	0.257269	0.0666589	0.0554374	0.0415903	0.0280383	0.0301113
#15	0.328687	0.25922	0.163364	0.0566561	0.0312643	0.0283295		#15	0.398986	0.26519	0.190594	0.0901562	0.0289075	0.0333487		#15	0.289827	0.244927	0.209787	0.0744497	0.0334587	0.025319
#16	0.233237	0.118833	0.10879	0.0619212	0.0161737	0.0123812		#16	0.363552	0.210126	0.139608	0.0566843	0.0230279	0.0167683		#16	0.153334	0.205166	0.180869	0.0944485	0.0259404	0.017375
#17	0.196038	0.23153	0.0971146	0.0509292	0.0209608	0.0221868		#17	0.377758	0.176371	0.104913	0.0536288	0.0287351	0.0206623		#17	0.279749	0.384065	0.118097	0.0552298	0.0318613	0.0246426
#18	0.237613	0.253543	0.194436	0.0451959	0.0606885	0.0298604		#18	0.544593	0.407024	0.147509	0.075256	0.0682166	0.0370928		#18	0.342234	0.399994	0.421763	0.0574669	0.0678198	0.0299293
#19	0.348392	0.127929	0.0826914	0.0654893	0.0484884	0.032118		#19	0.282689	0.0875922	0.0604381	0.115188	0.0438549	0.0184453		#19	0.238201	0.571797	0.47739	0.136616	0.0479438	0.0364631
#20	0.120131	0.0900255	0.0547217	0.0305704	0.0222715	0.0298721		#20	0.233098	0.175079	0.0766417	0.0504436	0.0220361	0.0299175		#20	0.148125	0.18339	0.0993911	0.0381611	0.0261025	0.0292719
#21	0.143919	0.11891	0.108301	0.0604362	0.0232438	0.0193754		#21	0.192824	0.109765	0.0952499	0.0441391	0.0269638	0.0190225		#21	0.115875	0.0908663	0.101748	0.0339472	0.0228556	0.0205408
#22	0.154756	0.134985	0.0840142	0.0443269	0.0206721	0.0196139		#22	0.193553	0.324747	0.0828194	0.0433543	0.0204735	0.0239393		#22	0.157498	0.143709	0.0677865	0.0553151	0.0273237	0.0218264
#23	0.167887	0.10306	0.0648911	0.0383118	0.0339036	0.0174062		#23	0.213295	0.444017	0.0471574	0.0468195	0.0409683	0.0150207		#23	0.30922	0.233848	0.0606284	0.0474075	0.0409507	0.0161382
#24	0.150242	0.19413	0.11777	0.0555085	0.0258398	0.0146243		#24	0.356812	0.315598	0.105353	0.0372158	0.0247355	0.017884		#24	0.165266	0.188926	0.139157	0.0432908	0.023577	0.0178531
#25	0.0338658	0.0558748	0.0445795	0.0498687	0.0171807	0.0165218		#25	0.0315838	0.262289	0.139561	0.0536366	0.0406291	0.0143563		#25	0.0455294	0.190257	0.0717717	0.0450272	0.0284514	0.0228755
#26	0.162552	0.0811366	0.0719255	0.0508825	0.0285505	0.025058		#26	0.26679	0.142144	0.11053	0.0487073	0.0334002	0.0289824		#26	0.272179	0.295193	0.0995811	0.058759	0.0341003	0.024558
#27	0.127254	0.0995811	0.0729582	0.0408727	0.0212454	0.024828		#27	0.113677	0.215054	0.0868685	0.0585423	0.0226325	0.0219984		#27	0.112696	0.206499	0.140658	0.0461657	0.0364862	0.0171061
#28	0.139685	0.0891914	0.0698153	0.0994122	0.0395416	0.0432516		#28	0.517642	0.185833	0.068189	0.0333058	0.0405308	0.0205537		#28	0.0985816	0.233799	0.245875	0.174542	0.0301057	0.0328087
#29	0.17696	0.137294	0.0755867	0.0394102	0.0227289	0.0188903		#29	0.209088	0.152226	0.0670354	0.0418199	0.0220348	0.0203348		#29	0.240421	0.146059	0.0891948	0.0458247	0.0403468	0.0196376
#30	0.388426	0.233766	0.171609	0.0843789	0.0365388	0.0306134		#30	0.585631	0.438753	0.141497	0.0753815	0.0335439	0.0317035		#30	0.416099	0.375802	0.156421	0.102921	0.0461143	0.0358671

## Sheet: Figure 2C
Moduratory effect	ITI								ITI
MR	4 sec	3 sec	2 sec	1 sec	0.5 sec	0.33 sec		MA	4 sec	3 sec	2 sec	1 sec	0.5 sec	0.33 sec
#1	335.864	132.61	132.421	77.2512	131.312	108.278		#1	73.7084	111.489	350.291	119.957	147.819	99.969
#2	211.587	143.51	132.836	48.645	88.9722	138.799		#2	93.9898	94.8133	162.343	101.211	75.2362	114.115
#3	372.039	108.679	82.9441	106.712	79.4649	119.049		#3	117.288	113.527	72.5169	172.091	99.0525	113.751
#4	112.057	159.492	164.132	123.234	99.1763	128.406		#4	105.4	187.995	222.125	146.531	123.582	120.148
#5	121.529	247.846	75.3711	108.739	99.9311	164.144		#5	162.028	75.2206	72.8201	94.1748	78.7177	118.527
#6	98.2249	121.6	75.8921	87.3554	126.633	69.5216		#6	71.2881	140.848	112.001	128.896	141.944	76.7228
#7	16.1298	35.4905	124.184	124.716	107	130.291		#7	20.719	77.4983	158.105	115.872	104.01	132.918
#8	108.662	176.606	122.156	75.0787	92.4241	91.513		#8	151.169	207.751	180.533	82.8836	91.8407	106.666
#9	190.004	77.3226	114.438	114.783	65.0956	89.7672		#9	113.226	123.613	134.842	123.709	87.7732	70.8567
#10	87.2155	142.121	148.843	159.447	72.0817	110.444		#10	26.6875	114.092	401.05	216.546	128.11	92.2315
#11	60.9887	106.719	85.0933	122.63	112.282	86.3272		#11	88.9769	232.264	147.492	140.689	99.2771	125.815
#12	84.1447	90.2737	81.2962	110.168	105.608	94.9819		#12	260.784	71.1144	118.341	140.611	100.877	103.673
#13	205.552	126.959	106.254	86.1971	119.374	103.506		#13	239.083	306.643	228.358	44.1059	138.795	111.562
#14	533.596	196.127	159.889	81.859	89.32	81.2884		#14	343.716	111.579	182.606	99.3089	49.3509	97.3167
#15	121.388	102.303	116.668	159.129	92.4618	117.717		#15	88.1772	94.4861	128.417	131.406	107.019	89.3732
#16	155.872	176.825	128.329	91.5425	142.378	135.434		#16	65.7419	172.651	166.256	152.53	160.386	140.334
#17	192.696	76.1766	108.03	105.301	137.09	93.1286		#17	142.701	165.882	121.605	108.444	152.005	111.069
#18	229.193	160.534	75.865	166.511	112.405	124.221		#18	144.03	157.762	216.917	127.151	111.751	100.231
#19	81.1411	68.4694	73.0888	175.888	90.4441	57.4299		#19	68.3715	446.965	577.316	208.609	98.8769	113.528
#20	194.037	194.477	140.057	165.008	98.943	100.152		#20	123.303	203.709	181.63	124.83	117.201	97.9906
#21	133.981	92.3093	87.9492	73.0342	116.004	98.1786		#21	80.514	76.4158	93.9497	56.1703	98.3298	106.015
#22	125.07	240.58	98.5779	97.8057	99.0395	122.053		#22	101.771	106.463	80.6847	124.789	132.177	111.28
#23	127.047	430.832	72.6716	122.206	120.838	86.2952		#23	184.183	226.904	93.431	123.741	120.786	92.7155
#24	237.492	162.57	89.4568	67.0453	95.7266	122.29		#24	110	97.3194	118.16	77.9894	91.2431	122.078
#25	93.2616	469.422	313.06	107.556	236.481	86.893		#25	134.441	340.507	160.997	90.2915	165.601	138.457
#26	164.126	175.192	153.673	95.7249	116.986	115.661		#26	167.441	363.823	138.45	115.48	119.438	98.0046
#27	89.3306	215.959	119.066	143.231	106.529	88.6032		#27	88.5598	207.368	192.793	112.95	171.737	68.8985
#28	370.579	208.353	97.6706	33.5028	102.502	47.5213		#28	70.5743	262.132	352.179	175.574	76.1367	75.8554
#29	118.156	110.876	88.6868	106.114	96.9459	107.647		#29	135.862	106.384	118.003	116.276	177.513	103.956
#30	150.77	187.689	82.4534	89.3369	91.8035	103.561		#30	107.124	160.76	91.15	121.974	126.207	117.162

## Sheet: Figure 2D
ITI of maximum modulatory effects
Subject	MR	MA
#1	4	2
#2	4	2
#3	4	1
#4	2	2
#5	3	4
#6	0.5	0.5
#7	0.33	2
#8	3	3
#9	4	2
#10	1	2
#11	1	3
#12	1	4
#13	4	3
#14	4	4
#15	1	1
#16	3	3
#17	4	3
#18	4	2
#19	1	2
#20	3	3
#21	4	0.33
#22	3	0.5
#23	3	3
#24	4	0.33
#25	3	3
#26	3	3
#27	3	3
#28	4	2
#29	4	0.5
#30	3	3

## Sheet: Figure 3
			Modulatory effect
Subject	Accuracy	Response time	MR	MA
#1	0.909091	3.8287	335.864	350.291
#2	0.181818	3.75556	211.587	162.343
#3	0.909091	4.94328	372.039	172.091
#4	0.545455	4.35867	164.132	222.125
#5	0.454545	4.99578	247.846	162.028
#6	0.818182	4.379	126.633	141.944
#7	0.272727	5.41562	130.291	158.105
#8	0.545455	6.16989	176.606	207.751
#9	0.0909091	4.75289	190.004	134.842
#10	0.909091	4.65871	159.447	401.05
#11	0.636364	4.07553	122.63	232.264
#12	0.363636	5.27776	110.168	260.784
#13	0.818182	5.53243	205.552	306.643
#14	0.818182	5.22445	533.596	343.716
#15	0.727273	4.1145	159.129	131.406
#16	0.909091	3.65129	176.825	172.651
#17	0.636364	4.41044	192.696	165.882
#18	0.727273	6.04155	229.193	216.917
#19	0.818182	3.76773	175.888	577.316
#20	0.545455	6.70994	194.477	203.709
#21	0.272727	4.80799	133.981	106.015
#22	0.181818	3.48236	240.58	132.177
#23	0.181818	3.81267	430.832	226.904
#24	1	3.47844	237.492	122.078
#25	0.727273	5.48514	469.422	340.507
#26	1	4.09591	175.192	363.823
#27	0.727273	3.84664	215.959	207.368
#28	0.727273	5.42339	370.579	352.179
#29	0.454545	4.61587	118.156	177.513
#30	0.363636	4.47809	187.689	160.76
